# Supplementary material for: Metabolism-based targeting of MYC via MPC-SOD2 axis-mediated oxidation promotes cellular differentiation in group 3 medulloblastoma
Source: PubMed Central journal article supplement (PMC10154337; doi:10.1038/s41467-023-38049-9), 2023-05-02
Supplement: 41467_2023_38049_MOESM1_ESM.pdf [file 41467_2023_38049_MOESM1_ESM.pdf]

## **Supplementary Information**

**Metabolism-based targeting of MYC via MPC-SOD2 axis-mediated oxidation promotes cellular differentiation in group 3 medulloblastoma**

Martell et al.,

# Supplementary Figure 1.

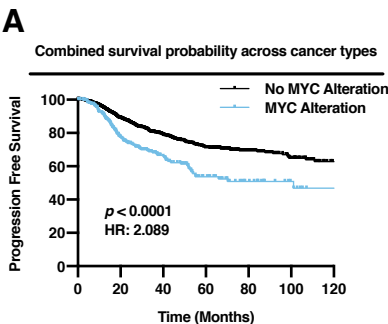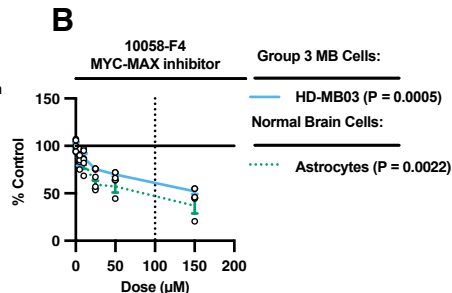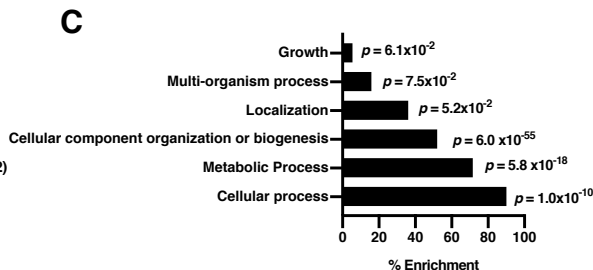

**D** RNA-Sequencing G3 MB Tumors Cavalli et al. 2017

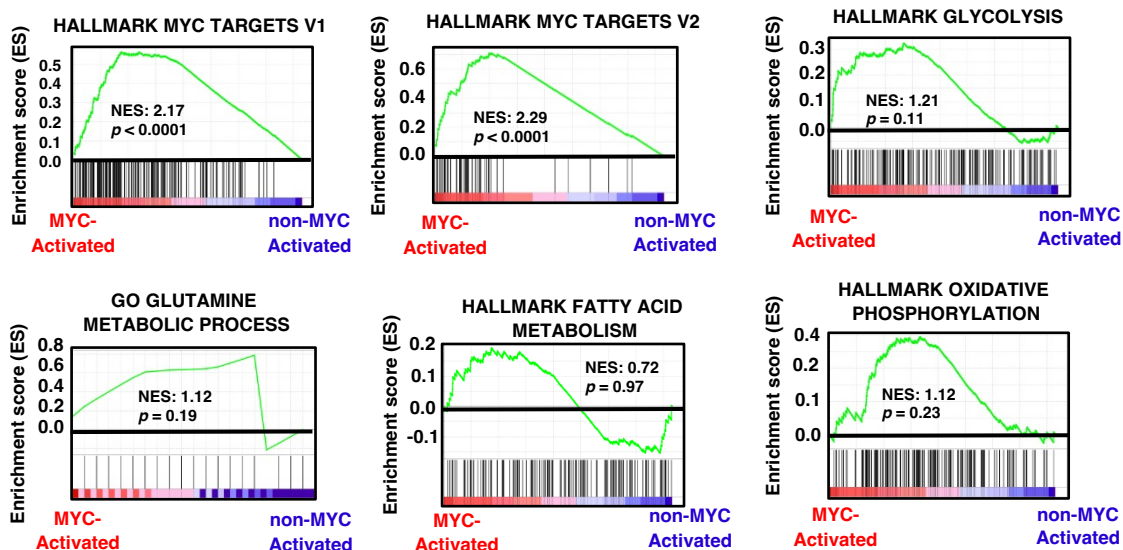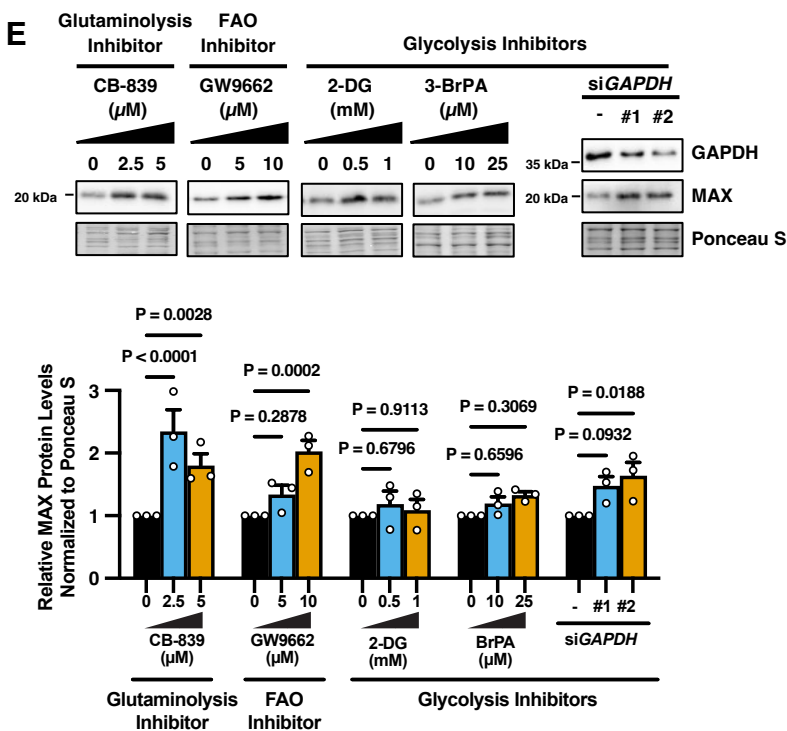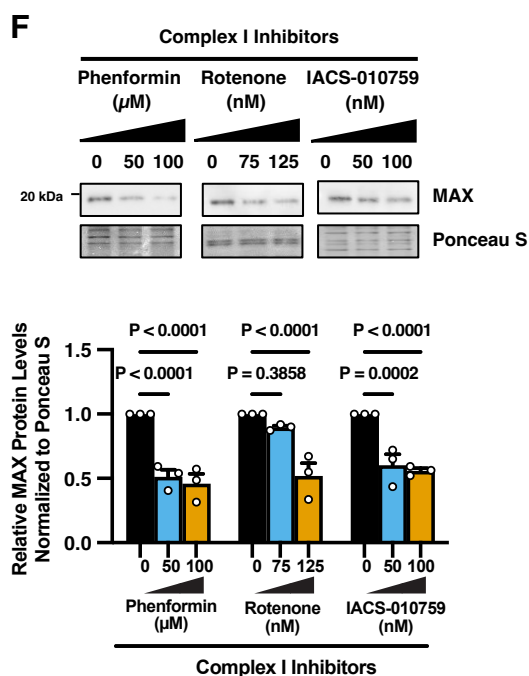

**Supplementary Figure 1.** (A) *Kaplan Meier* analysis of progression-free survival probability of patients with MYC-altered versus non-MYC altered tumors from Pan-cancer TCGA data,  $N = 10612$  cases<sup>1-3</sup>. P-values and hazard ratio were determined using the logrank method. (B) HD-MB03 cells and normal human astrocytes were treated with 10058-F4 at various doses (5, 10, 25, 50 & 150  $\mu\text{M}$ ) and cells were counted after 24 hours. Values are plotted as mean of % of controls  $\pm$  SEM and p-values were calculated using two-sided student's t-test of maximum dose versus untreated controls. (C) Analysis of proteomics data of G3 MB tumors ( $N = 14$ ) from Archer *et al.* 2018<sup>4</sup> and significantly differentially expressed proteins in MYC-activated versus non-MYC activated tumors ( $>2.0$  fold-change and  $p < 0.05$  based on two-sided student's t-test) were subjected to functional annotation clustering with gene ontology (GO) to identify differentially functionally enriched processes (p-values were determined using Fisher's exact t-test). (D) Analysis of RNA-sequencing data of G3 MB tumors ( $N = 144$ ) from Cavalli *et al.* 2017<sup>5</sup> and gene set enrichment analysis (GSEA) was performed with Hallmark and gene ontology (GO) gene sets (enrichment scores and p-values are calculated using a weighted two-sided Kolmogorov–Smirnov-like statistic and normalized based on the size of the gene set to yield the normalized enrichment score, NES)<sup>6,7</sup>. (E-F) HD-MB03 cells were treated for 24 hours with indicated doses of metabolic inhibitors CB-839, GW9662, 2-DG, 3-BrPA, siGAPDH (two independent clones) and (F) complex-I inhibitors phenformin, rotenone, or IACS-010759, and MAX protein levels were monitored by immunoblotting. Graph represents mean values  $\pm$  SEM of densitometry quantification of blots from  $N = 3$  experimental replicates. P-values are calculated using two-way ANOVA with Tukey's multiple comparisons. Source data provided in Source Data File.

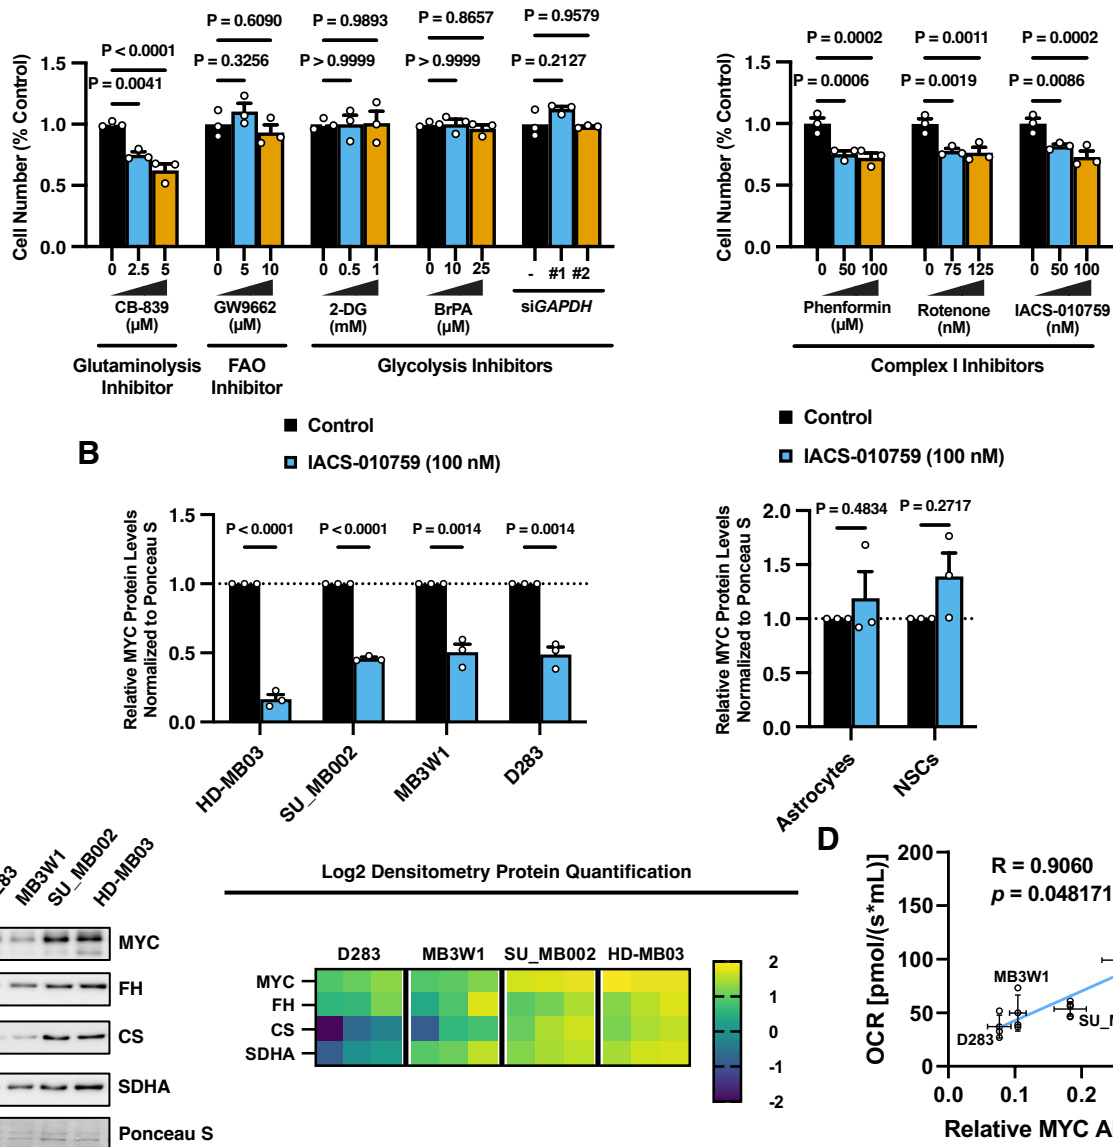

**Supplementary Figure 2.** (A) HD-MB03 G3 MB cells were treated with indicated doses of metabolic inhibitors CB-839, GW9662, 2-DG, 3-BrPA, *siGAPDH* (two independent clones), phenformin, rotenone, or IACS-010759 and counted after 24 hours. Values are plotted as mean percent cell number relative to respective vehicle controls  $\pm$  SEM from  $N = 3$  experimental replicates. P-values were calculated using two-way ANOVA with Tukey's multiple comparisons. (B) Densitometry quantifications of western blots of MYC from  $N = 3$  experimental replicates of HD-MB03, SU\_MB002, MB3W1, D283, and normal human brain cells (astrocytes and neural stem cells; NSCs) that were treated with IACS-010759 for 24 hours. Values are plotted as mean  $\pm$  SEM and p-values are calculated using two-sided students t-test. (C) The protein levels of MYC and mitochondrial metabolic enzymes (fumarate hydratase, FH; citrate synthase, CS; and succinate dehydrogenase, SDHA) were compared in various G3 MB cells (D283, MB3W1, SU\_MB002, and HD-MB03) by western blot analysis. Heat map displaying the log<sub>2</sub> densitometry quantification of  $N = 3$  experimental replicates. (D) The correlation between relative MYC protein abundance determined by western blot and the maximal oxygen consumption rate (OCR) of various G3 MB cells (D283,  $N = 4$  experimental replicates; MB3W1,  $N = 4$  experimental replicates; SU\_MB002,  $N = 5$  experimental replicates; and HD-MB03,  $N = 5$  experimental replicates) was plotted as means  $\pm$  SEM of x and y values and Pearson correlation analysis was performed ( $R = 0.9060$ ,  $p = 0.048171$ ). Source data provided in Source Data File.

# Supplementary Figure 3.

## B

Growth and Viability Analysis

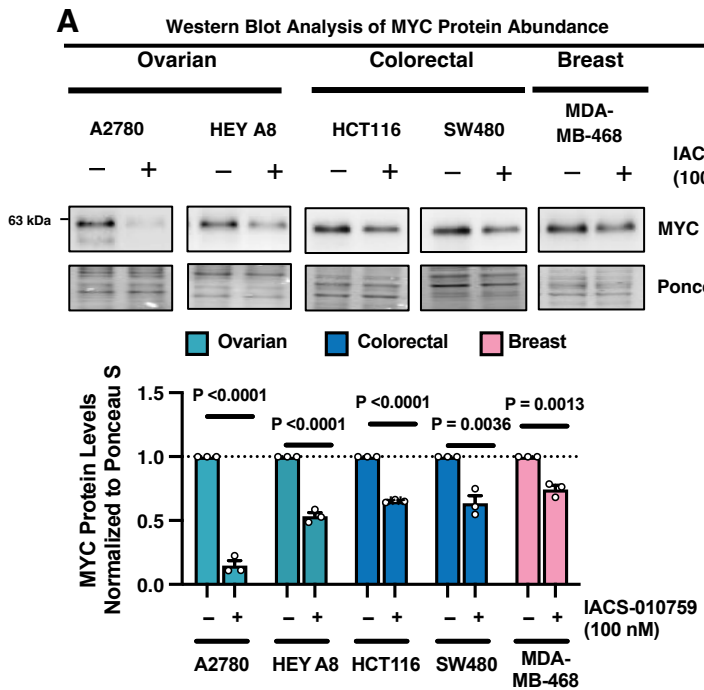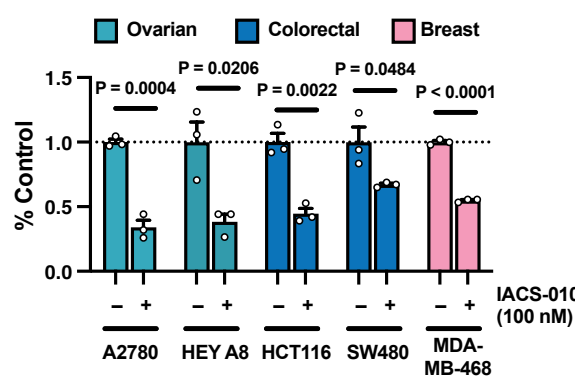

## C

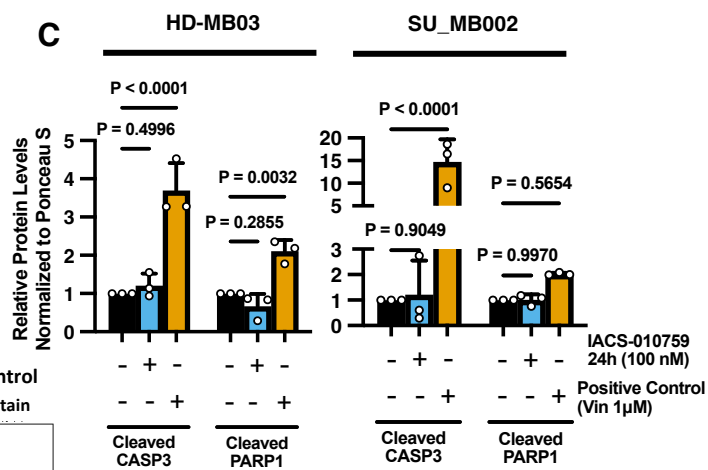

## D Gating Strategy

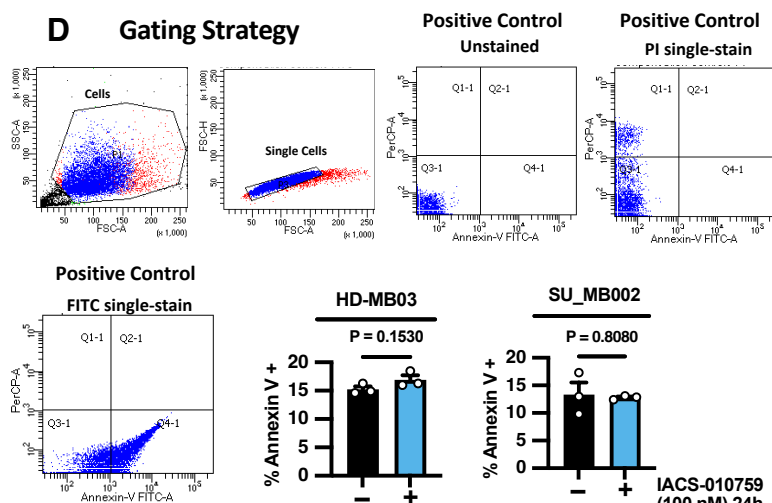

## E

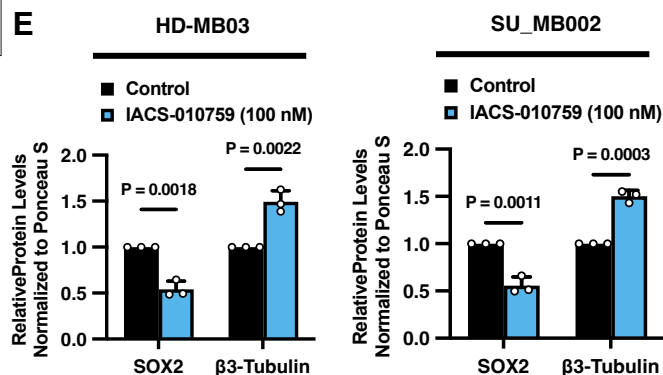

## F

Ovarian Cancer

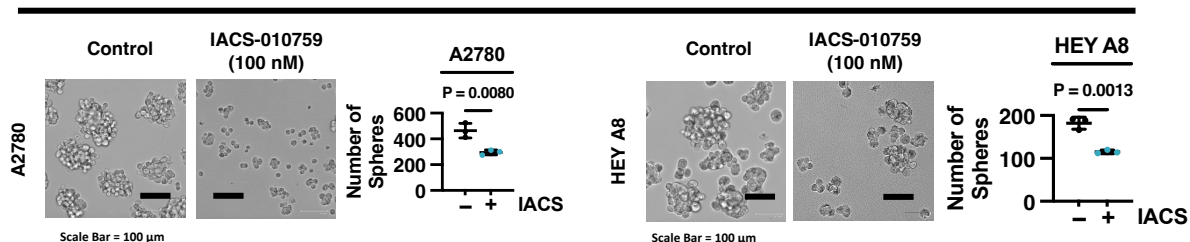

## G

Normal Human Neural Stem Cells (NSCs)

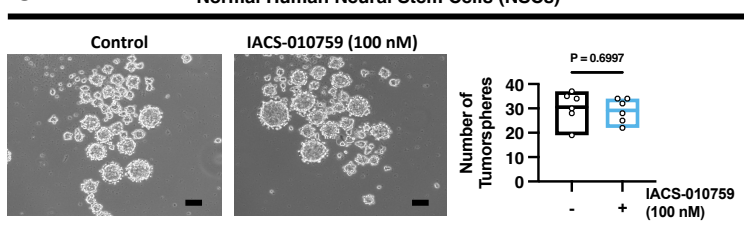

## H

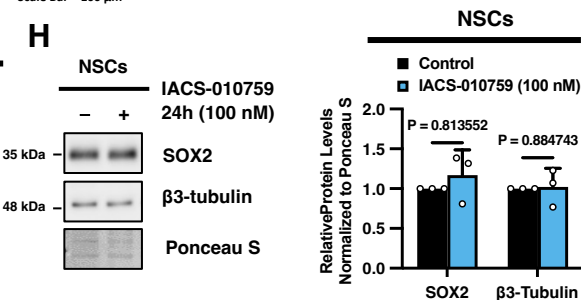

**Supplementary Figure 3.** (A-B) Various cancer celllines from ovarian (A2780 and HEYA8), colorectal (HCT116 and SW40), and breast (MDA-MB-468) cancer were treated with 100 nM of IACS-010759 and (A) subjected to immunoblot analysis for MYC and graph represents mean densitometry quantification +/- SEM from  $N = 3$  blots and (B) mean cell number +/- SEM counted after 24 hours ( $N = 3$  experimental replicates). P-values were calculated using two-sided student's t-test relative to respective vehicle controls. (C) Densitometry quantification of western blots of cleaved caspase-3 and cleaved PARP1 presented as mean +/- SEM from  $N = 3$  experimental replicates of HD-MB03 and SU\_MB002 cells treated with IACS-010759 for 24 hours or positive control cytotoxic chemotherapy vincristine (1  $\mu$ M). P-values were calculated using two-sided student's t-test relative to respective vehicle controls.  $N = 3$  experimental replicates. (D) Gating strategy used for flow cytometry analysis in Figure 2F and percentage of Annexin V positive populations measured by flow cytometry presented as mean +/- SEM of vehicle control versus IACS-010759 treated (100 nM) HD-MB03 and SU\_MB003 G3 MB cells. P-values were calculated using two-sided student's t-test relative to respective vehicle controls from  $N = 3$  experimental replicates. (E) Densitometry quantification of western blots of SOX2 and  $\beta$ 3-tubulin presented as mean +/- SEM from  $N = 3$  experimental replicates of HD-MB03 and SU\_MB002 cells treated with IACS-010759 for 24 hours. P-values were calculated using two-sided student's t-test relative to respective vehicle controls. (F) Representative tumorsphere images (Scale Bar = 100  $\mu$ m) and quantification of total sphere number (>50  $\mu$ m) from cancer cell lines (A2780 and HEYA8) treated with 100 nM of IACS-010759 presented as mean +/- SEM from  $N = 3$  experimental replicates. P-values were calculated using two-sided student's t-test relative to respective vehicle controls. (G) Representative tumorsphere images (Scale Bar = 100  $\mu$ m) and quantification of total sphere number (>50  $\mu$ m) from neural stem cells (NSCs) treated with 100 nM of IACS-010759 presented as box-plot with the box limits at minima and maxima and centre line at mean from  $N = 6$  experimental replicates. P-values were calculated using two-sided student's t-test relative to respective vehicle controls. (H) Western blots along with densitometry quantification presented as mean +/- SEM of SOX2 and  $\beta$ 3-tubulin from  $N = 3$  experimental replicates of normal human NSCs treated with IACS-010759 for 24 hours. P-values were calculated using two-sided student's t-test relative to respective vehicle controls. Source data provided in Source Data File.

# Supplementary Figure 4.

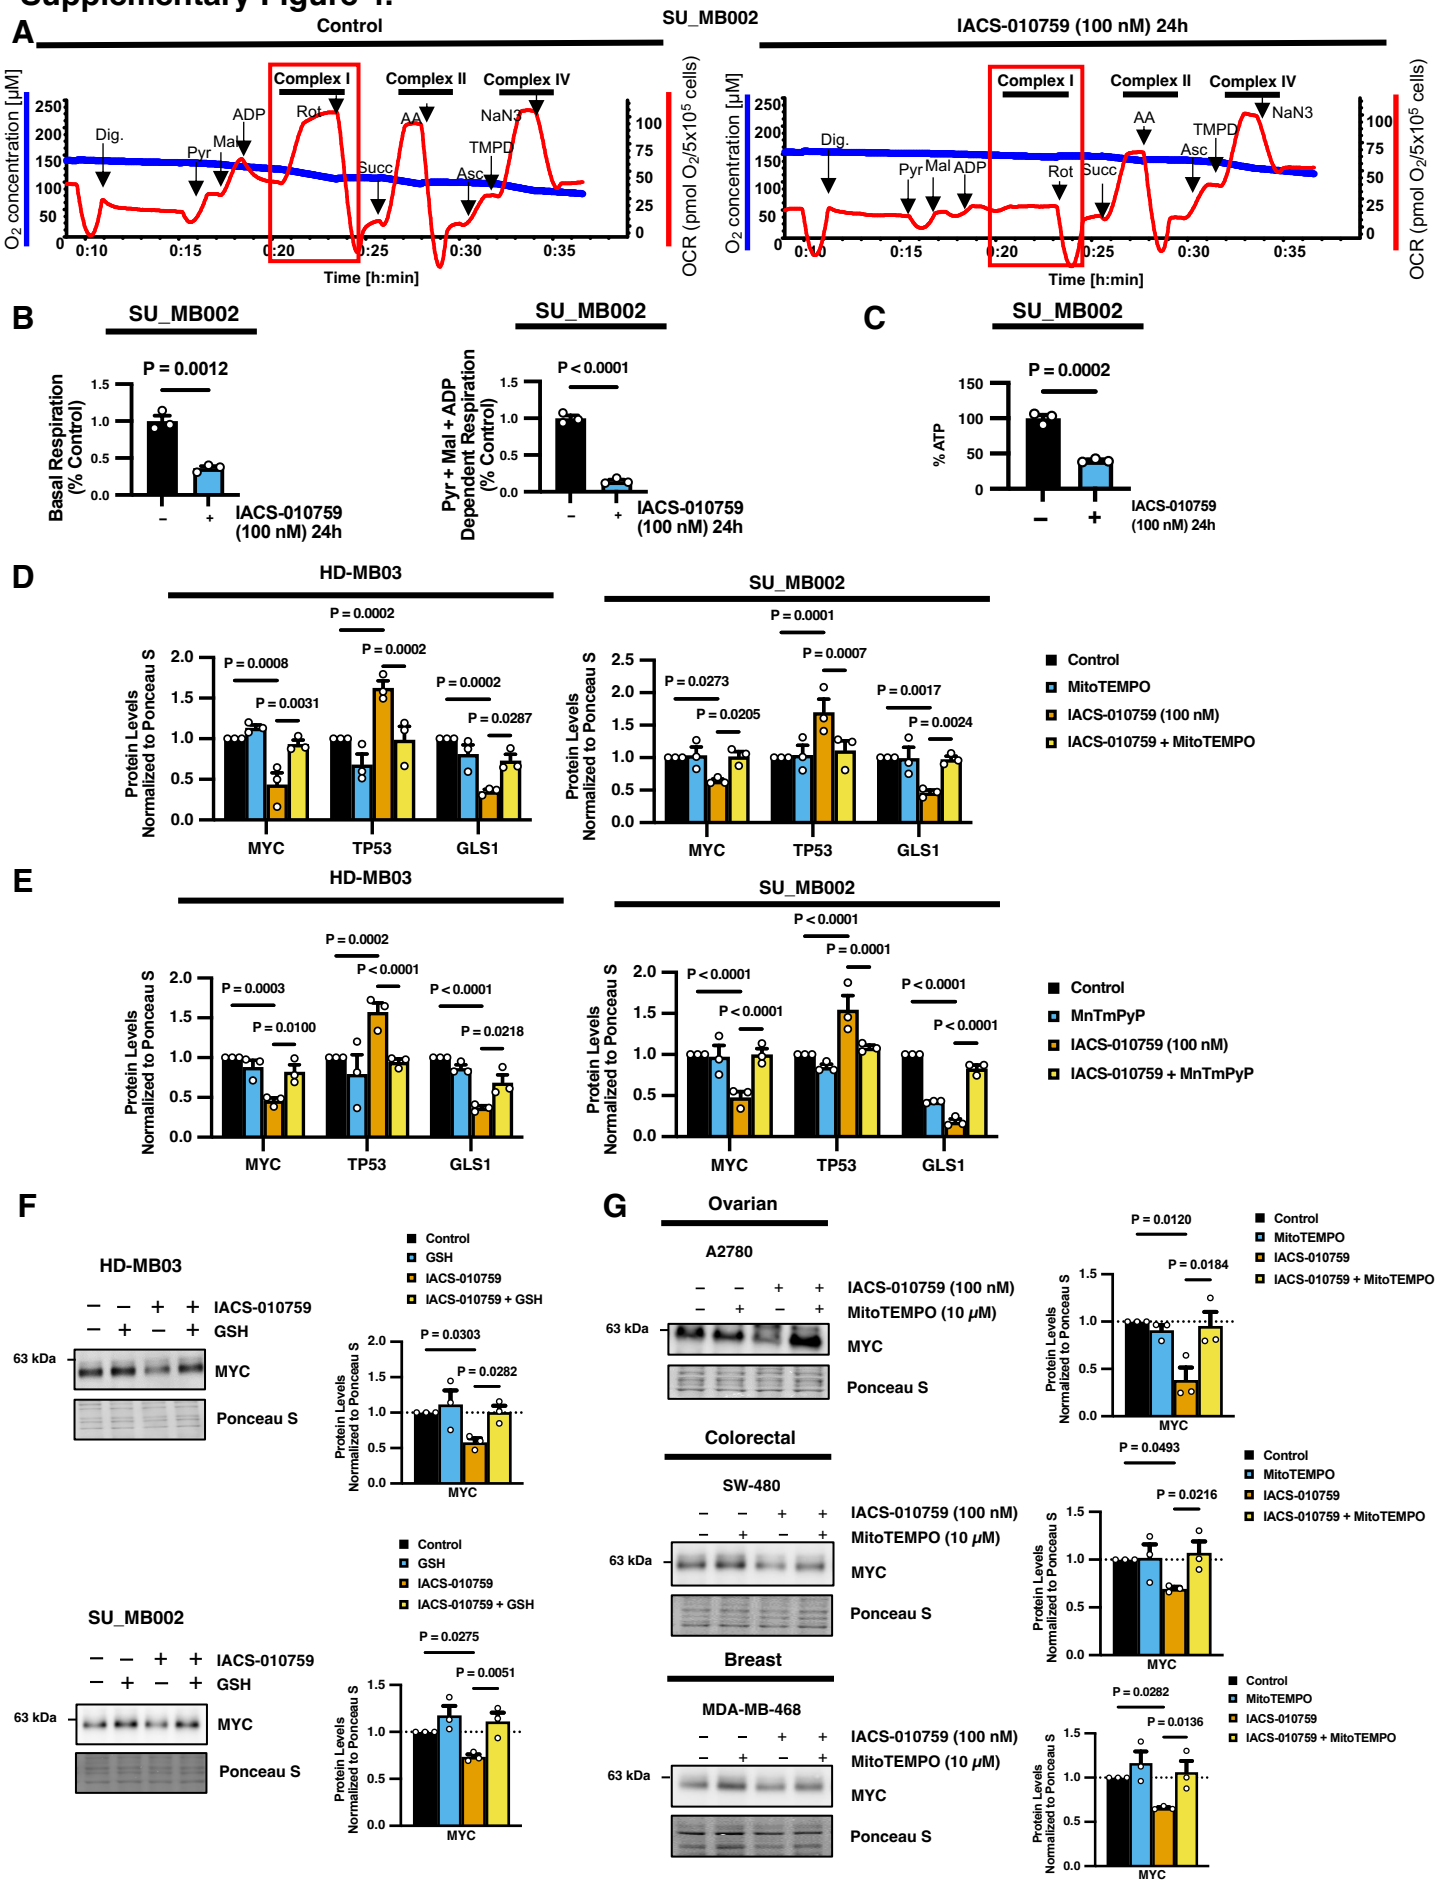

**Supplementary Figure 4. (A-B)** SU\_MB002 cells were treated with IACS-010759 for 24 hours and subjected to Oroboros respirometry where **(A)** a representative tracing of oxygen consumption rate (OCR) substrate-specific oxygen consumption activity from  $N = 3$  experimental replicates and **(B)** quantifications of basal and pyruvate-malate dependent OCR in SU\_MB002 cells treated with IACS-010759 for 24 hours presented as mean  $\pm$  SEM where p-values were calculated using two-sided student's t-test relative to vehicle control. **(C)** ATP levels in SU\_MB002 cells following IACS-010759 treatment for 24 hours presented as mean  $\pm$  SEM ( $N = 3$  experimental replicates) where p-values were calculated using two-sided student's t-test relative to vehicle control. **(D-E)** Densitometry quantifications of western blots of MYC, TP53, and GLS1 presented as mean  $\pm$  SEM from  $N = 3$  experimental replicates of HD-MB03 and SU\_MB002 G3 MB cells treated with IACS-010759 along with either **(E)** MitoTEMPO or **(E)** MnTmPyP for 24 hours. P-values were calculated using two-way ANOVA with Tukey's multiple comparisons. **(F)** Representative western blots and densitometry quantifications of MYC presented as mean  $\pm$  SEM from  $N = 3$  experimental replicates of HD-MB03 and SU\_MB002 G3 MB cells treated with IACS-010759 along with the antioxidant glutathione (GSH). P-values were calculated using one-way ANOVA with Tukey's multiple comparisons. **(G)** Representative western blots and densitometry quantifications of MYC presented as mean  $\pm$  SEM from  $N = 3$  experimental replicates of ovarian (A2780), colorectal (SW-480) and breast (MDA-MB-468) cells treated with IACS-010759 along with the antioxidant MitoTEMPO. P-values were calculated using one-way ANOVA with Tukey's multiple comparisons. Source data provided in Source Data File.



# Supplementary Figure 5.

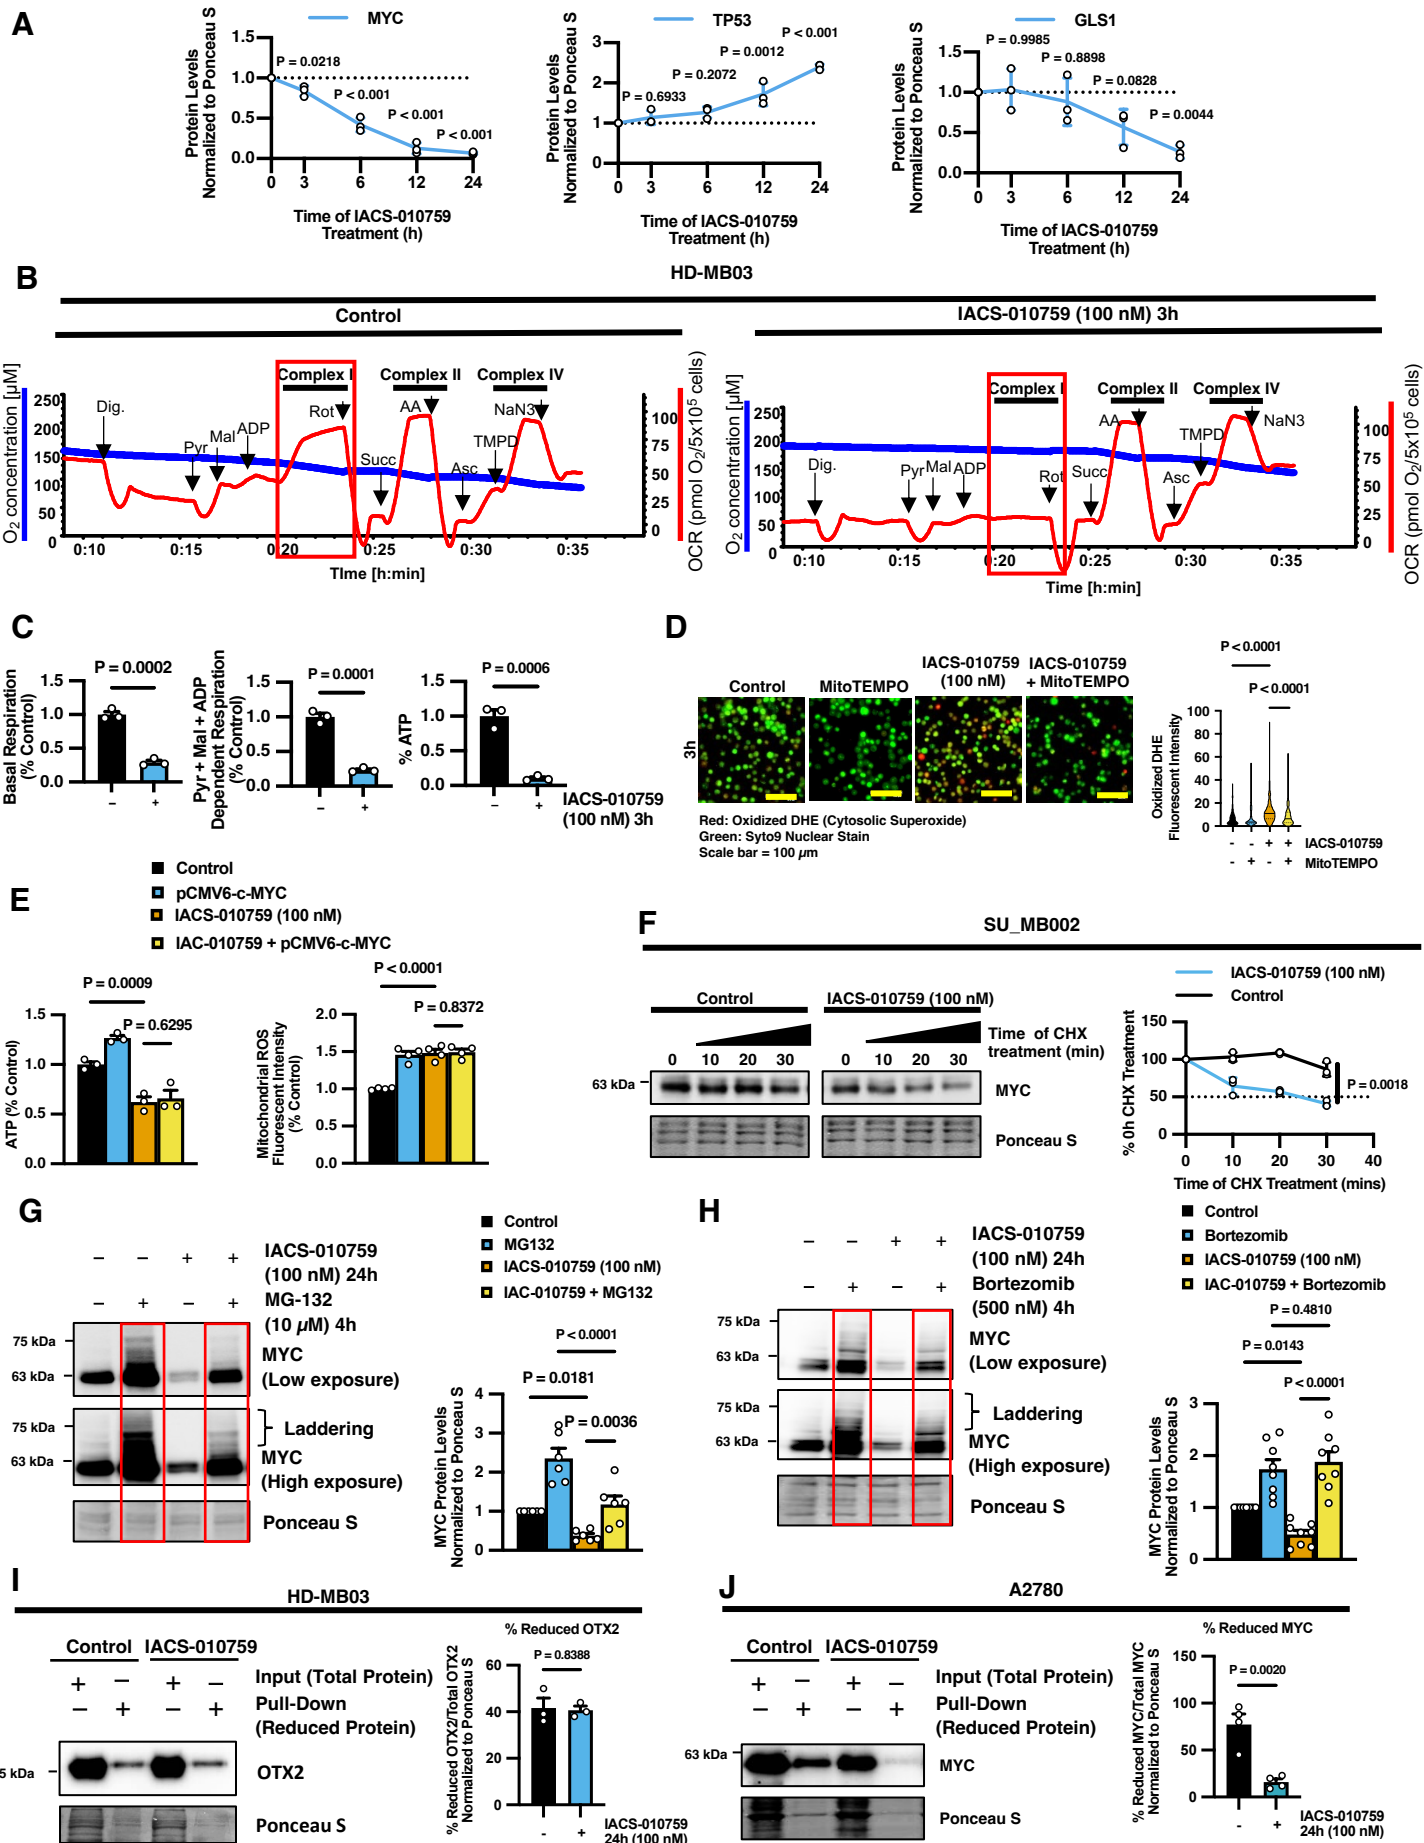

**Supplementary Figure 5.** (A) Densitometry quantification of western blots of MYC, TP53, and GLS1 in HD-MB03 cells treated with IACS-010759 at various time points plotted as mean  $\pm$  SEM. P-values were calculated using one-way ANOVA with Dunnett's multiple comparisons relative to respective vehicle controls.  $N = 3$  experimental replicates. (B-C) HD-MB03 G3 MB cells were treated with IACS-010759 for 3 hours and subjected to Oroboros respirometry where (B) a representative tracing of OCR shows substrate-specific oxygen consumption and (C) baseline oxygen consumption, pyruvate-malate dependent oxygen consumption, and ATP levels were quantified and presented as mean  $\pm$  SEM from  $N = 3$  experimental replicates. P-values were calculated using two-sided student's t-test relative to vehicle control. (D) Representative images (Scale Bar = 100  $\mu$ m) of HD-MB03 cells treated with 100 nM of IACS-010759 and/or 10  $\mu$ M of MitoTEMPO for 3 hours and labeled with DHE total superoxide stain and Syto9 green nuclear counter stain. Violin Plot represents the quantification of red fluorescent intensity per cell of  $N > 100$  cells from  $N = 3$  experimental replicates with solid line at mean and dashed lines at quartiles. P-values were calculated using two-way ANOVA with Tukey's multiple comparisons. (E) HD-MB03 cells were treated with IACS-010759 followed by exogenous overexpression of MYC for 48 hours and subjected to analysis of ATP levels ( $N = 3$  experimental replicates) and mitochondrial superoxide production by MitoSOX staining ( $N = 4$  experimental replicates) presented as mean  $\pm$  SEM. P-values were calculated using one-way ANOVA with Fisher's LSD test. (F) Representative western blots of MYC in SU\_MB002 cells treated with IACS-010759 for 24 hours followed by the translation inhibitor cycloheximide (CHX) for 10, 20, and 30 minutes. Graphs represents densitometry quantification of blots from  $N = 3$  experimental replicates presented as mean  $\pm$  SEM. P-values were calculated at final time point using two-sided student's t-test relative to respective vehicle control. (G-H) HD-MB03 cells were treated with 100 nM of IACS-010759 for 24 hours followed by the proteasome inhibitors (G) MG-132 (10  $\mu$ M;  $N = 6$  experimental replicates) or (H) Bortezomib (500 nM ;  $N = 8$  experimental replicates) for 4 hours and subjected to immunoblot analysis for MYC. Graphs represents densitometry quantification of blots presented as mean  $\pm$  SEM. P-values were calculated using one-way ANOVA with Fisher's LSD test. (I) HD-MB03 cells treated with 100 nM of IACS-010759 and proteins with reduced cysteine thiols were labeled in lysates with maleimide-PEG2 biotin. Reduced proteins were precipitated with streptavidin agarose and subjected to immunoblot analysis for OTX2 relative to input lysates (no precipitation). Graphs represent densitometry quantification of blots from  $N = 3$  experimental replicates presented as mean  $\pm$  SEM. P-values were calculated using two-sided student's t-test relative to vehicle control. (J) A2780 cells treated with 100 nM of IACS-010759 and proteins with reduced cysteine thiols were labeled in lysates with maleimide-PEG2 biotin. Reduced proteins were precipitated with streptavidin agarose and subjected to immunoblot analysis for MYC relative to input lysates (no precipitation). Graphs represent densitometry quantification of blots from  $N = 3$  experimental replicates presented as mean  $\pm$  SEM. P-values were calculated using two-sided student's t-test relative to vehicle control. Source data provided in Source Data File.

# Supplementary Figure 6.

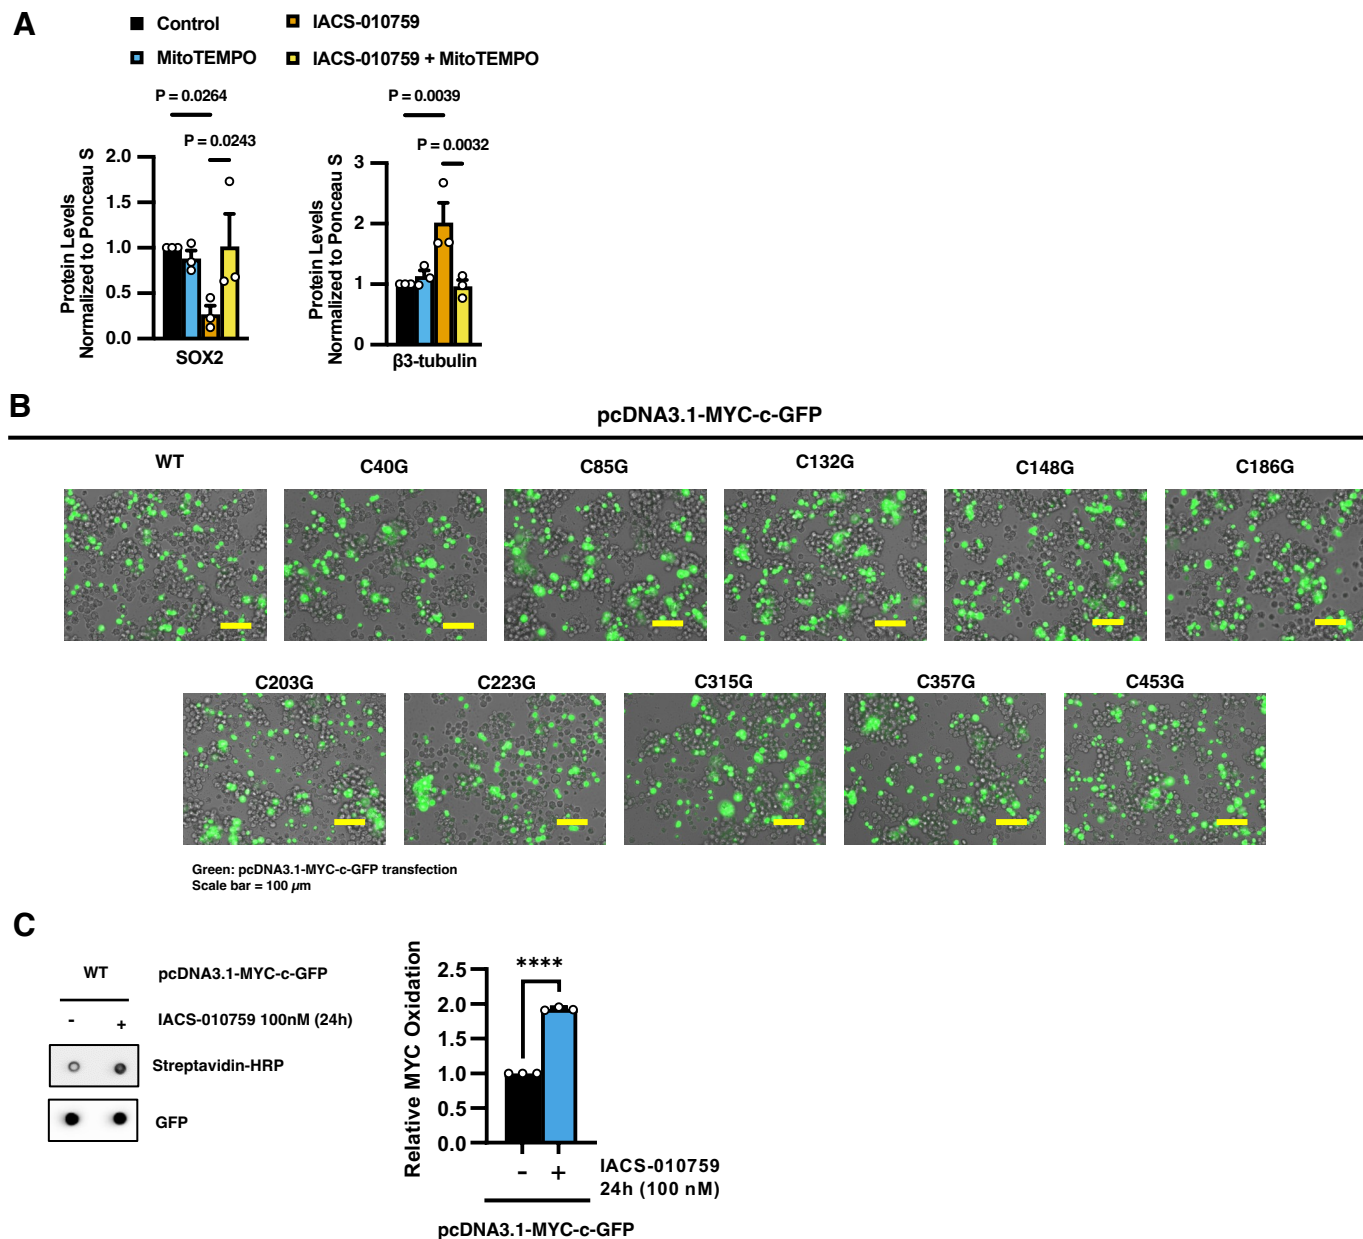

**Supplementary Figure 6.** (A) Densitometry quantification of western blots of SOX2 and  $\beta 3$ -tubulin in HD-MB03 cells treated with IACS-010759 and/or MitoTEMPO from  $N = 3$  experimental replicates presented as mean  $\pm$  SEM. P-values were calculated using one-way ANOVA with Fisher's LSD test. (B) Overlay of GFP fluorescent and brightfield microscopy of HD-MB03 cells expressing exogenous pcDNA3.1-MYC-c-eGFP MYC protein containing either wild-type MYC or point mutations in one of the 10 individual cysteine residues to monitor expression efficiency. Representative images (Scale Bar = 100  $\mu$ m) from  $N = 3$  experimental replicates. (C) Dot blot analysis of oxidized immunoprecipitated exogenous pcDNA3.1-MYC-c-eGFP containing wild-type MYC protein in control and IACS-010759 treated HD-MB03 cells. Densitometry quantification of  $N = 3$  experimental replicates presented as mean  $\pm$  SEM. P-values were calculated using two-sided student's t-test relative to vehicle control. Source data provided in Source Data File.

## Supplementary Figure 7.

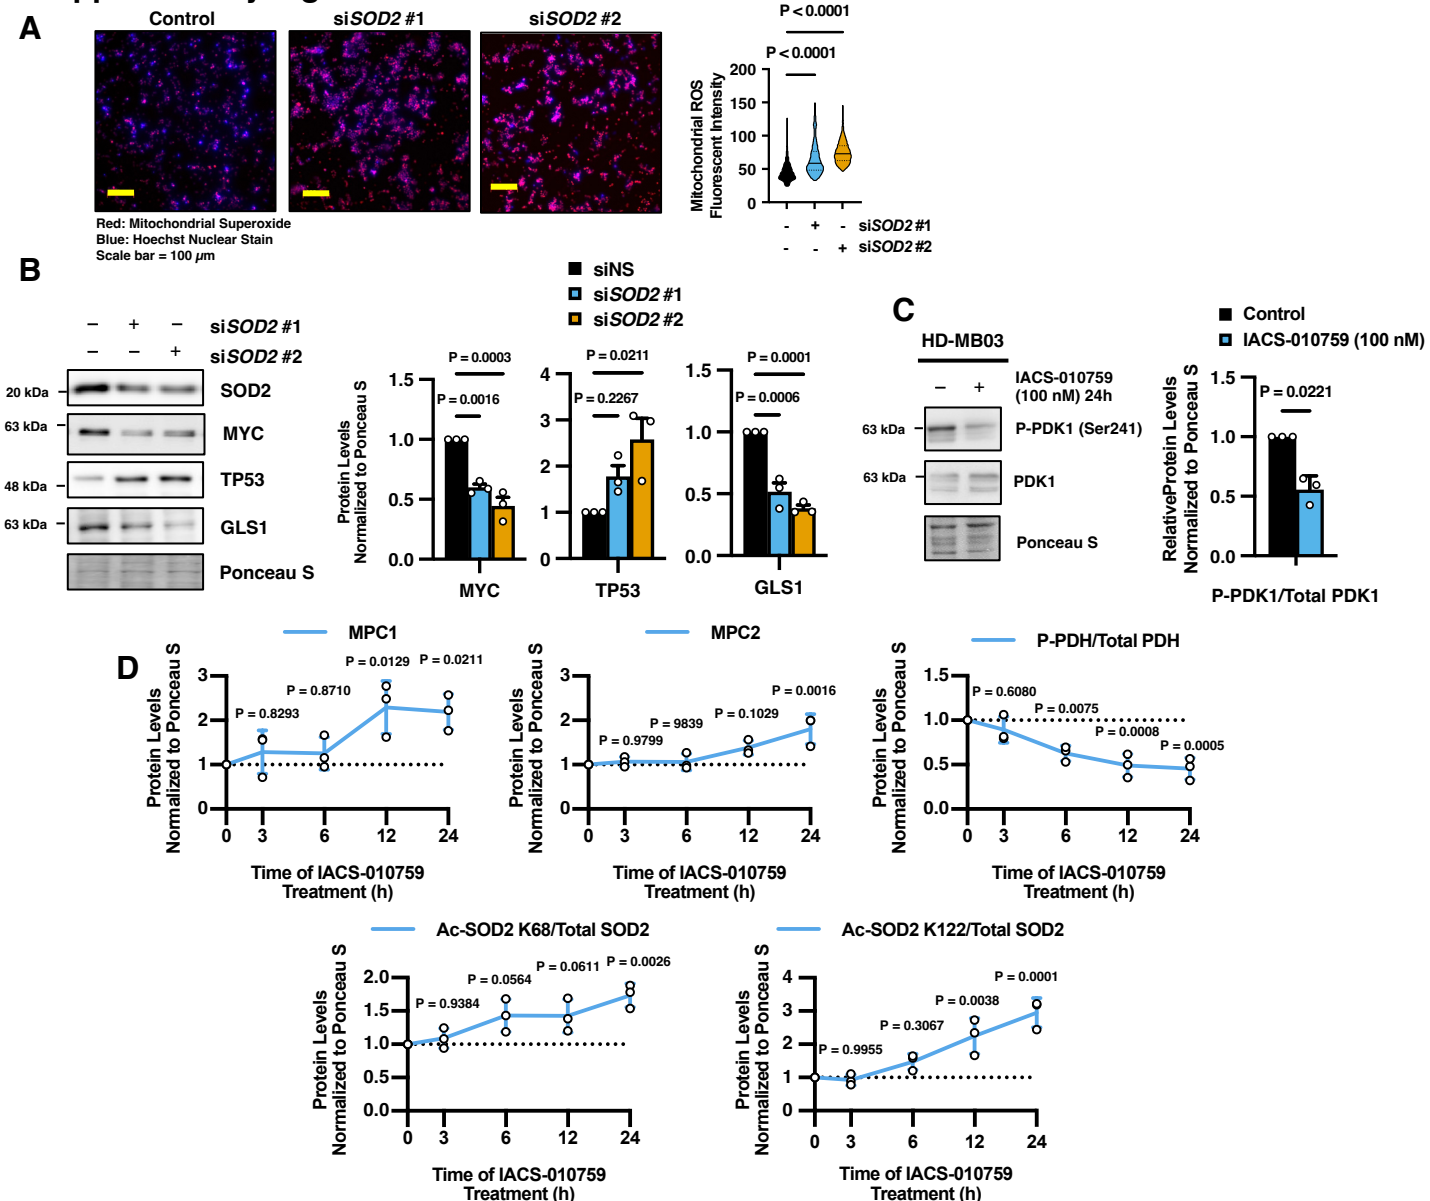

**Supplementary Figure 7.** (A) Representative images (Scale Bar = 100  $\mu$ m) of MitoSOX red mitochondrial-specific superoxide stain with blue Hoechst nuclear counter stain in non-specific siRNA control HD-MB03 cells or siSOD2 knockdown cells from two independent siRNA clones (#1 and #2). Violin plot represents quantification of fluorescent intensity per cell with solid line at mean and dashed lines at quartiles. P-values were calculated using one-way ANOVA with Tukey's multiple comparisons.  $N > 100$  cells from  $N = 3$  experimental replicates. (B) HD-MB03 cells with siSOD2 knockdown from two independent siRNA clones (#1 and #2) were subjected to western blot analysis for SOD2, MYC, TP53 and GLS1. Densitometry quantification of western blots from  $N = 3$  experimental replicates relative to non-specific siRNA control cells presented as mean  $\pm$  SEM. P-values were calculated using one-way ANOVA with Tukey's multiple comparisons. (C) HD-MB03 cells were treated with 100 nM of IACS-010759 and subjected to western blot analysis for P-PDK1 (Ser241) and total PDK1. Densitometry quantification of western blots from  $N = 3$  experimental replicates presented as mean  $\pm$  SEM. P-values were calculated using two-sided student's t-test relative to vehicle control. (D) Densitometry quantification of western blots presented as mean  $\pm$  SEM from  $N = 3$  experimental replicates of MPC1, MPC2, P-PDH (Ser293), PDH, Ac-SOD2 K68, Ac-SOD2 K122, and SOD2 from HD-MB03 cells treated with 100 nM IACS-010759 for indicated time points. P-values were calculated using one-way ANOVA with Dunnett's multiple comparisons relative to respective vehicle controls. Source data provided in Source Data File.

# Supplementary Figure 8.

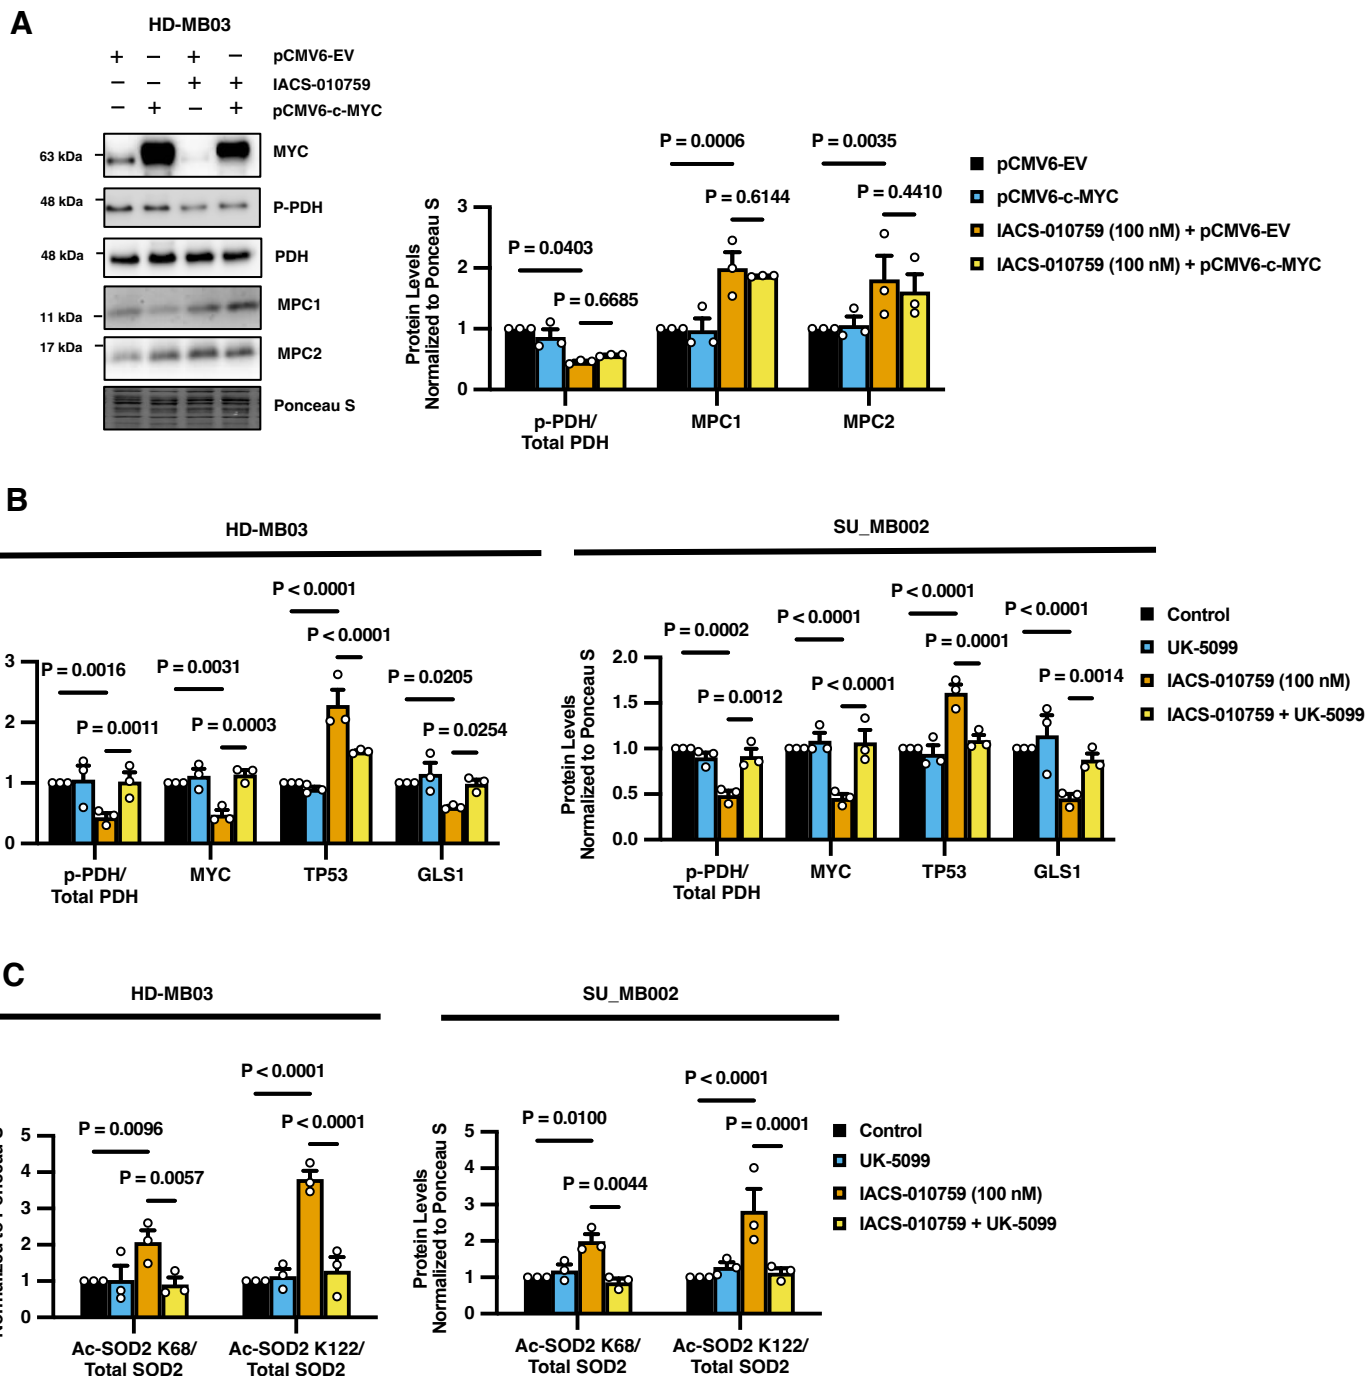

**Supplementary Figure 8.** (A) HD-MB03 cells were treated with 100 nM of IACS-010759 followed by exogenous overexpression of MYC for 48 hours and subjected to immunoblot analysis of P-PDH (Ser293), PDH, MPC1, and MPC2. Densitometry quantification presented as mean  $\pm$  SEM from  $N = 3$  experimental replicates. P-values were calculated using two-way ANOVA with Fisher's LSD test. (B-C) Densitometry quantification of western blots presented as mean  $\pm$  SEM from  $N = 3$  experimental replicates for (B) p-PDH (Ser293), PDH, MYC, TP53, GLS1, (C) Ac-SOD2 K68, Ac-SOD2 K122, and SOD2 in HD-MB03 and SU\_MB002 G3 MB cells treated with IACS-010759 and/or UK-5099 for 24 hours. P-values were calculated using two-way ANOVA with Fisher's LSD test. Source data provided in Source Data File.

# Supplementary Figure 9.

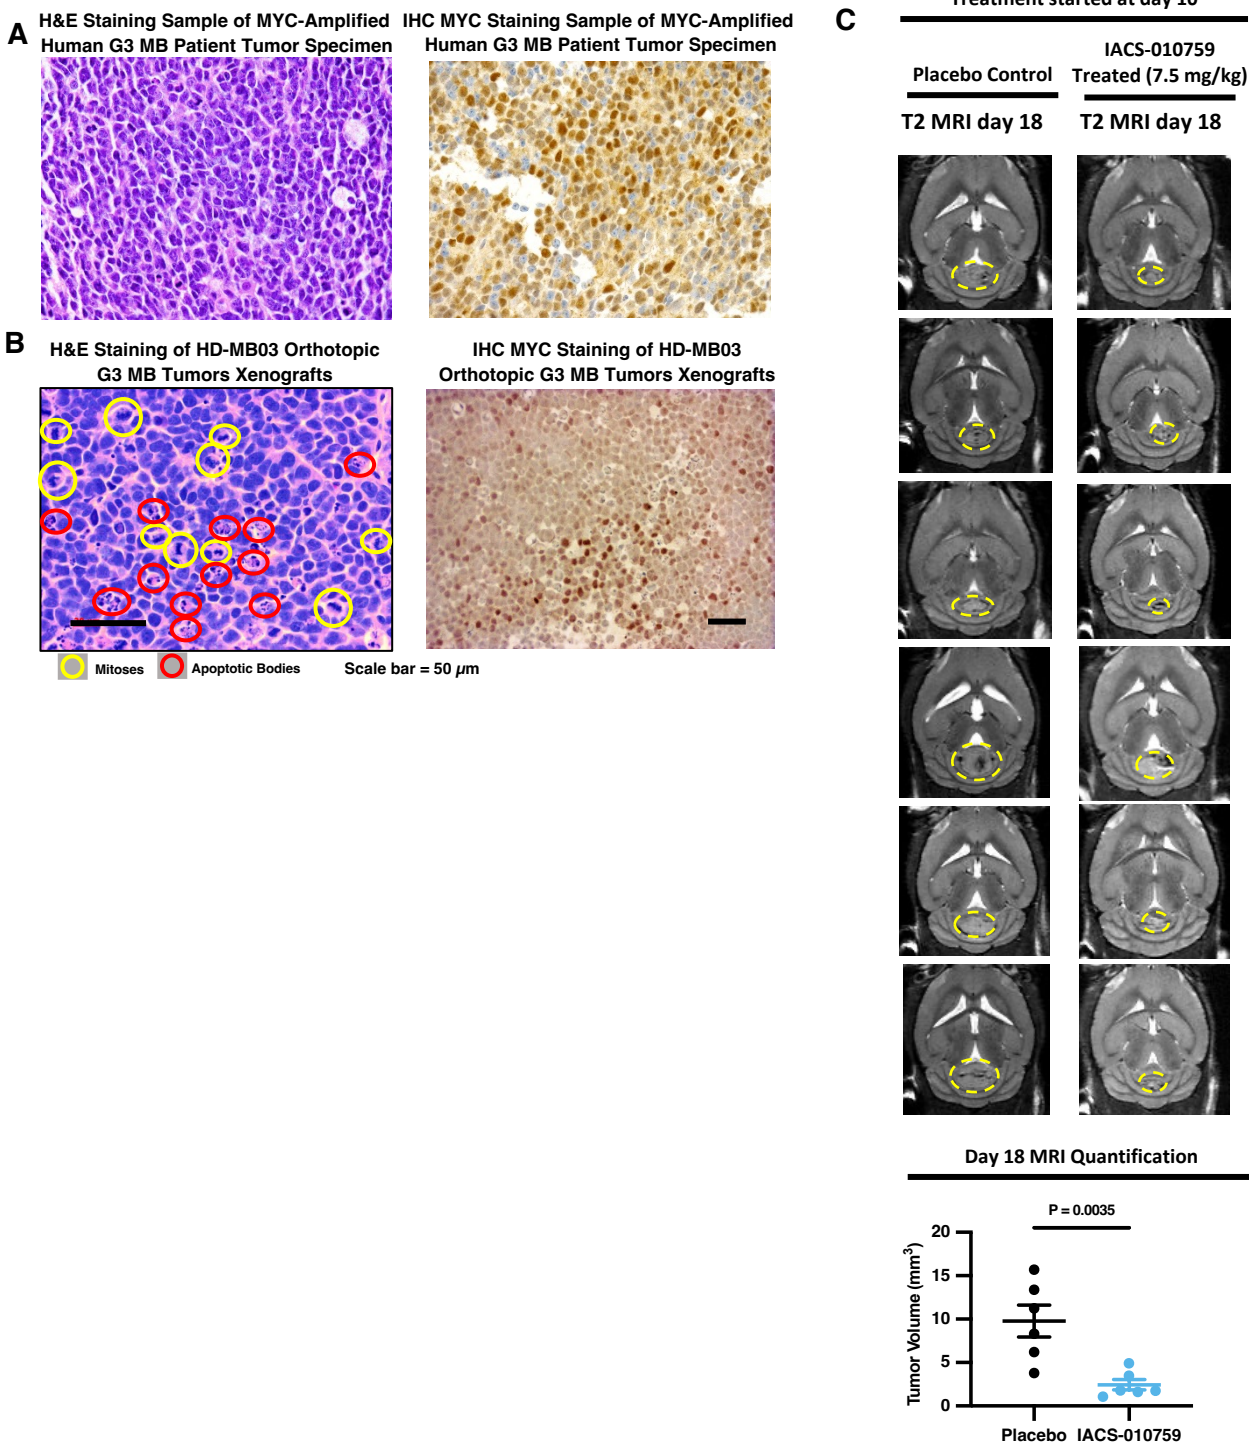

**Supplementary Figure 9.** (A) Representative images of anaplastic large cell G3 MB patient tumor specimen with H&E staining and immunohistochemistry (IHC) staining of MYC available open access from the r2genomics server in the Pediatric PDX (Olson) portal (Med-411FH)<sup>8</sup>. (B) Representative images of HD-MB03 orthotopic intracerebellar tumor xenografts with H&E staining (Scale Bar = 200 μm) and immunohistochemistry (IHC) staining of MYC (Scale Bar = 50 μm) from *N* = 5 control animals. (C) T2 MRI images of tumor masses from matching planes at 18-days post-surgery and H&E stained brain slices from mice that received either placebo control (0.5% methylcellulose; *N* = 6 animals) or 7.5 mg/kg Q2Dx5 IACS-010759 treatment (*N* = 6 animals) starting at 10-days post-surgery. Quantification of tumor volume from 18-day MRI images presented as mean ± SEM. P-values were calculated using two-sided student's t-test relative to vehicle control. Source data provided in Source Data File.

**Supplementary Table 1. List of treatment compounds used in this study**

|                                     | <b>Vendor</b>               | <b>Catalog No.</b>         | <b>Dose(s)</b>                      |
|-------------------------------------|-----------------------------|----------------------------|-------------------------------------|
| <b>10058-F4</b>                     | Abcam                       | ab145065                   | 5, 10, 25, 50, & 150 $\mu$ M        |
| <b>CB-839</b>                       | Selleckchem                 | S7655                      | 2.5 & 5 $\mu$ M                     |
| <b>GW-9662</b>                      | Sigma-Aldrich               | M6191                      | 5 & 10 $\mu$ M                      |
| <b>2-DG</b>                         | Sigma-Aldrich               | D8375                      | 0.25, 0.5, 1, 2, 3 mM               |
| <b>3-BrPA</b>                       | Sigma-Aldrich               | 16490                      | 10, 25, 50, 100, & 250 $\mu$ M      |
| <b>Phenformin</b>                   | Selleckchem                 | S2542                      | 10, 50, 100, 250, & 500 $\mu$ M     |
| <b>Rotenone</b>                     | Sigma-Aldrich               | R8875                      | 10, 50, 100, 500, & 1000 nM         |
| <b>IACS-010759 (in vitro)</b>       | Selleckchem                 | S8731                      | 100 nM (unless otherwise indicated) |
| <b>IACS-010759 (in vivo)</b>        | MedChem Express             | HY-112037                  | 7.5 mg/kg                           |
| <b>siGAPDH clone #1</b>             | Invitrogen; silencer select | 4390824; assay ID: s5572   | 50 nM                               |
| <b>siGAPDH clone #2</b>             | Invitrogen; silencer select | 4390824; assay ID: s5573   | 50 nM                               |
| <b>Negative control siRNA</b>       | Invitrogen                  | AM4635                     | 50 nM                               |
| <b>siSOD2 clone #1</b>              | Invitrogen; silencer select | 4390824; assay ID: n323027 | 50 nM                               |
| <b>siSOD2 clone #2</b>              | Invitrogen; silencer select | 4390824; assay ID: s13268  | 50 nM                               |
| <b>Vincristine</b>                  | Selleckchem                 | S1241                      | 1 $\mu$ M                           |
| <b>pCMV6-EV</b>                     | Origene                     | RC201611                   | 1.5 $\mu$ g/mL                      |
| <b>pCMV6-c-MYC</b>                  | Origene                     | PS100001                   | 1.5 $\mu$ g/mL                      |
| <b>pcDNA3.1(+)-MYC-c-eGFP</b>       | Genscript                   | SC1844                     | 1.5 $\mu$ g/mL                      |
| <b>pcDNA3.1(+)-MYC-C40G-c-eGFP</b>  | Genscript                   | SC1844                     | 1.5 $\mu$ g/mL                      |
| <b>pcDNA3.1(+)-MYC-C85G-c-eGFP</b>  | Genscript                   | SC1844                     | 1.5 $\mu$ g/mL                      |
| <b>pcDNA3.1(+)-MYC-C132G-c-eGFP</b> | Genscript                   | SC1844                     | 1.5 $\mu$ g/mL                      |
| <b>pcDNA3.1(+)-MYC-C148G-c-eGFP</b> | Genscript                   | SC1844                     | 1.5 $\mu$ g/mL                      |
| <b>pcDNA3.1(+)-MYC-C186G-c-eGFP</b> | Genscript                   | SC1844                     | 1.5 $\mu$ g/mL                      |
| <b>pcDNA3.1(+)-MYC-C203G-c-eGFP</b> | Genscript                   | SC1844                     | 1.5 $\mu$ g/mL                      |
| <b>pcDNA3.1(+)-MYC-C223G-c-eGFP</b> | Genscript                   | SC1844                     | 1.5 $\mu$ g/mL                      |
| <b>pcDNA3.1(+)-MYC-C315G-c-eGFP</b> | Genscript                   | SC1844                     | 1.5 $\mu$ g/mL                      |
| <b>pcDNA3.1(+)-MYC-C357G-c-eGFP</b> | Genscript                   | SC1844                     | 1.5 $\mu$ g/mL                      |
| <b>pcDNA3.1(+)-MYC-C453G-c-eGFP</b> | Genscript                   | SC1844                     | 1.5 $\mu$ g/mL                      |
| <b>MitoTEMPO</b>                    | Cayman                      | 16621                      | 10 $\mu$ M                          |
| <b>MnTmPyp</b>                      | Adipogen                    | AG-CR1-0026                | 50 $\mu$ M                          |
| <b>Glutathione</b>                  | Santa Cruz                  | sc-203974                  | 100 $\mu$ M                         |
| <b>Cyclohexamide</b>                | Sigma-Aldrich               | C7698                      | 1.25 $\mu$ M                        |
| <b>MG-132</b>                       | Sigma-Aldrich               | M8699                      | 10 $\mu$ M                          |
| <b>Bortezomib</b>                   | Selleckchem                 | S1013                      | 500 nM                              |
| <b>UK-5099</b>                      | Cayman                      | 16980                      | 10 $\mu$ M                          |

**Supplementary Table 2. List of antibodies used for immunoblotting**

|                             | <b>Vendor</b>             | <b>Catalog No.</b> | <b>Dilution</b> |
|-----------------------------|---------------------------|--------------------|-----------------|
| <b>CPTA1</b>                | Cell Signaling Technology | 97361S             | 1:1000          |
| <b>PPAR<sub>γ</sub></b>     | Cell Signaling Technology | 2435S              | 1:1000          |
| <b>c-MYC</b>                | Cell Signaling Technology | 18583S             | 1:1000          |
| <b>MAX</b>                  | Cell Signaling Technology | 4739S              | 1:1000          |
| <b>GAPDH</b>                | DSHB                      | DSHB-hGAPDH-2G7    | 1:250           |
| <b>Cleaved Caspase-3</b>    | Cell Signaling Technology | 9661S              | 1:1000          |
| <b>PARP1</b>                | Santa Cruz                | sc-8007            | 1:1000          |
| <b>SOX2</b>                 | Cell Signaling Technology | 3579S              | 1:1000          |
| <b>β3-tubulin</b>           | R&D Systems               | MAB1195            | 1:1000          |
| <b>P53</b>                  | Santa Cruz                | sc-126             | 1:1000          |
| <b>GLS1</b>                 | Cell Signaling Technology | 88964S             | 1:1000          |
| <b>Poly Ubiquitin</b>       | Cell Signaling Technology | 3936S              | 1:1000          |
| <b>OTX2</b>                 | Abcam                     | ab21990            | 1:1000          |
| <b>GFP</b>                  | Santa Cruz                | sc-9996            | 1:1000          |
| <b>SOD2</b>                 | Cell Signaling Technology | 13141S             | 1:1000          |
| <b>Acetylated SOD2 K68</b>  | Abcam                     | ab137037           | 1:1000          |
| <b>Acetylated SOD2 K122</b> | Abcam                     | ab214675           | 1:1000          |
| <b>MPC1</b>                 | Cell Signaling Technology | 14462              | 1:1000          |
| <b>MPC2</b>                 | Cell Signaling Technology | 46141              | 1:1000          |
| <b>P-PDH</b>                | Cell Signaling Technology | 31866S             | 1:1000          |
| <b>PDH</b>                  | Cell Signaling Technology | 3205S              | 1:1000          |
| <b>P-PDK1</b>               | Cell Signaling Technology | 3438S              | 1:1000          |
| <b>PDK1</b>                 | Cell Signaling Technology | 3062S              | 1:1000          |
| <b>Goat anti-mouse HRP</b>  | Jackson Immunoresearch    | 115-035-003        | 1:10,000        |
| <b>Goat anti-rabbit HRP</b> | Jackson Immunoresearch    | 111-035-003        | 1:10,000        |

**Supplementary Table 3. List of antibodies used for immunohistochemistry**

|                                    | <b>Vendor</b>             | <b>Catalog No.</b> | <b>Dilution</b> |
|------------------------------------|---------------------------|--------------------|-----------------|
| <b>c-MYC</b>                       | Abcam                     | ab32072            | 1:100           |
| <b>Ki67</b>                        | Cell Signaling Technology | 9449S              | 1:800           |
| <b>SOX2</b>                        | Abcam                     | ab97959            | 1:100           |
| <b>β3-tubulin</b>                  | R&D Systems               | MAB1195            | 1:250           |
| <b>P53</b>                         | Santa Cruz                | sc-126             | 1:50            |
| <b>GLS1</b>                        | Cell Signaling Technology | 56750              | 1:200           |
| <b>8-Hydroxy-2'-deoxyguanosine</b> | Abcam                     | ab48508            | 1:50            |
| <b>4-Hydroxynonenal</b>            | Abcam                     | ab48506            | 1:25            |
| <b>MPC2</b>                        | ThermoFisher              | PA5-63246          | 1:20            |
| <b>MPC1</b>                        | ThermoFisher              | PA5-60929          | 1:500           |
| <b>Acetylated SOD2 K68</b>         | Abcam                     | ab137037           | 1:100           |
| <b>Sheep anti-mouse Biotin</b>     | Jackson Immunoresearch    | 515-065-003        | 1:500           |
| <b>Sheep anti-rabbit Biotin</b>    | Jackson Immunoresearch    | 111-065-144        | 1:500           |



**Supplementary Table 4. List of primer sequences used in this study**

|                  | <b>Forward Primer</b>    | <b>Reverse Primer</b>      |
|------------------|--------------------------|----------------------------|
| <i>MYC</i>       | CCTGGTGCTCCATGAGGAGAC    | CAGACTCTGACCTTTTGCCAGG     |
| <i>SOX2</i>      | GGGAAATGGAGGGGTGCAAAGAGG | TTGCGTGAGTGTGGATGGGATTGGTG |
| <i>NANOG</i>     | TGAACCTCAGCTACAAACAG     | TGGTGGTAGGAAGAGTAAAG       |
| <i>NES</i>       | TCAAGATGTCCCTCAGCCTGGA   | AAGCTGAGGGAAGTCTTGAGC      |
| <i>TUBB3</i>     | GGCCTCTTCTCACAAGTACG     | CCACTCTGACCAAAGATGA        |
| <i>MAP2</i>      | AGGCTGTAGCAGTCCTGAAAGG   | CTTCCTCCACTGTGACAGTCTG     |
| <i>NEUROD1</i>   | GGTGCCTTGCTATTCTAAGACGC  | GCAAAGCGTCTGAACGAAGGAG     |
| <i>NEUROG1</i>   | GCCTCCGAAGACTTCACCTACC   | GGAAAGTAACAGTGTCTACAAAGG   |
| <i>MILIP</i>     | AGAACC CGAAAGGCTACTG     | CACTTAAAGCCGGTCTGTTGGA     |
| <i>AIMP2</i>     | ACCACCAATGCGCTGGACTTGA   | AGGACCCTGAAGTGTCTACAGA     |
| <i>BYSL</i>      | CTCTCCAAGTGGGAGCAAATCC   | TGCGTTCCTTCAGGTTAGAGGC     |
| <i>CBX3</i>      | GCTGACAAACCAAGAGGATTTGC  | CAGCACCAAGTCTGCCTCATCT     |
| <i>CDK4</i>      | CCATCAGCACAGTTCGTGAGGT   | TCAGTTCGGGATGTGGCACAGA     |
| <i>DCTPP1</i>    | TCCATCAGCCTCGGAATCTCCT   | CCTCTTGAAGGGCTGCCCGTT      |
| <i>DDX18</i>     | GATGTGGCAGCGAGAGGACTAG   | GGCGAAAATGAGCAAGGCATG      |
| <i>DUSP2</i>     | TGTGGAGGACAACCAGATGGTG   | GAGGTATGCCAGACAGATGGTG     |
| <i>EXOSC5</i>    | GAACGGAAGCTGCTGATGTCCA   | GGTAGAAACGGAAGACGTGTTGC    |
| <i>FARSA</i>     | TGGCTGAGTTCACCAGATCGA    | TTGTAGGCTGGCTTGAAGCGGA     |
| <i>GNL3</i>      | TTTCCCAGGCTGATGCTCGACA   | GCAGTTTGGCAGCACCTTCAAC     |
| <i>GRWD1</i>     | CCATCTTCTCCTTCGCTGGACA   | AGGTGTCCAGAGGTGGATGTTT     |
| <i>HK2</i>       | GAGTTTGACCTGGATGTGGTTGC  | CCTCCATGTAGCAGGCATTGCT     |
| <i>HSPD1</i>     | TGCCAATGCTCACCGTAAGCCT   | AGCCTTGACTGCCACAACCTGA     |
| <i>HSPE1</i>     | GCTGAAACTGTAACCAAAGGAGG  | TCTCCAACCTTTCACGCTAACTGG   |
| <i>IMP4</i>      | CACCTCATCACACACGGCTTCT   | GTAGTCGTCCTGGTTTGCGAAG     |
| <i>IPO4</i>      | CCTCGCAAGTTGTACGCAATGC   | TGTCCAAGAGGCACCGACTTCA     |
| <i>LASIL</i>     | AAGGCAGCGAAGAGGTGGATTC   | GCACCGTAAACTGCTCCTCTTC     |
| <i>MAP3K6</i>    | CGCCACAAGAACATAGTGCCT    | ACTGATGGTGCTCTCGTTGTCC     |
| <i>MCM4</i>      | CTTGCTTCAGCCTTGGCTCCAA   | GTCGCCACACAGCAAGATGTTG     |
| <i>MCM5</i>      | GACTTACTCGCCGAGGAGACAT   | TGCTGCCTTTCAGACGTGTA       |
| <i>MPHOSPH10</i> | GGAAGTGACAGCACAGAAGAGG   | CCAGTTGAAGGGTGGTTTCTCTC    |
| <i>MRT04</i>     | ACAGCAAGCTGAAGGACATCCG   | GACCTGGTGCAGGTTGTCTTTG     |
| <i>MYBBP1A</i>   | CAGTTCGCAGACCTCCTGTTGA   | TCCAGCTCCTCAGAGTCTGCA      |
| <i>NDUFAF4</i>   | CAGCAAGATGAAGCCCTCTGTC   | CACATCTTTTAGAAACGACAGCAG   |
| <i>NIP7</i>      | AGAGCAGTCCTTCCTGTATGGG   | GCAGTCTGTGTAGATTTGGCTG     |
| <i>NOC4L</i>     | GGAACAATGCCTTCACGCTGCT   | TCAGGTGAGCAACCTTCCAGGT     |
| <i>NOLC1</i>     | GTAGCAGTGATGACTCAGAGGAG  | CTGGAGGAATCCTCACTGCTAG     |
| <i>NOP16</i>     | CCTATGTGCTGAATGACCTGGAG  | CGTGGTTCTTACCATGTAGCG      |
| <i>NOP2</i>      | CTGTCAATGCGACCTCCAAGAC   | GAAAGCGGGTAAAACCTTCTG      |
| <i>NOP56</i>     | GGCTAAGGCTATTCTGGATGCC   | TGTGTAGGCTCTGGCGGTATTC     |
| <i>NPM1</i>      | GCCAGTGCATATTAGTGGACAGC  | GGAACCTTGCTACCACCTCCAG     |
| <i>PA2G4</i>     | GCTCACCTTTGTGCTGAAGCTG   | GCTGCTTCAACTGGTGTGACAG     |

|                       |                         |                         |
|-----------------------|-------------------------|-------------------------|
| <b><i>PES1</i></b>    | TCGTGTGGATCACTCCCTATGC  | GGTTGAGCAACTGGTAAAGGCG  |
| <b><i>PHB</i></b>     | AAGCGGTGGAAGCCAAACAGGT  | GCCAGTGAGTTGGCAATCAGCT  |
| <b><i>PLK1</i></b>    | GCACAGTGTCAATGCCTCCAAG  | GCCGTACTTGTCCGAATAGTCC  |
| <b><i>PLK4</i></b>    | GACACCTCAGACTGAAACCGTAC | GTCCTTCTGCAAATCTGGATGGC |
| <b><i>PPAN</i></b>    | AGCAGAAACGGCTTGCCAAGTC  | GAACCCACTGAGTTTGTCTGTCG |
| <b><i>PPRC1</i></b>   | ATTGAGGCATCGGACCTGTCCA  | CCTGAGTTTCTACAGCCAAGC   |
| <b><i>PRMT3</i></b>   | CACTGTCTGCTGAAGCCGCATT  | GTAGATGACGAGCAGGTTCTGAC |
| <b><i>PUS1</i></b>    | TCAACAGCCACCTTCCCTCTCA  | GCAATAGGTCCTGGCATCACATC |
| <b><i>RABEPK</i></b>  | CACATCATCGGCAGCCATTGGA  | GGAGGATTTCCAAGTGTCTCTGG |
| <b><i>RCL1</i></b>    | CCTGTGAGGAAGGTCTTGAAGC  | GTTCCCATCTGAGGTGACACA   |
| <b><i>RRP12</i></b>   | AGTGCCTCCTACACATCGTGAG  | GAGCAGTGCAAAAGCGTTCTTCC |
| <b><i>RRP9</i></b>    | GTTGGTGGCAAAGAGATCCAGG  | CTTTGGCAGCAGAGAAGATGGC  |
| <b><i>SLC19A1</i></b> | CTTTGCCACCATCGTCAAGACC  | GGACAGGATCAGGAAGTACACG  |
| <b><i>SLC29A2</i></b> | GGATCTTGACCTGGAGAAGGAG  | GTGAAGACCAACACAAGGCACAG |
| <b><i>SORD</i></b>    | GCCGATACAATCTGTCACCTTCC | CGCCTTCTCAAAGGTGACATTG  |
| <b><i>SRM</i></b>     | CTACCAGGACATCCTCGTCTTC  | AGAGGCAGGTTGGCGATCATCT  |
| <b><i>SUPV3L1</i></b> | ACTTCTCAGCAAAGTCTGGAGTG | TGGCTGAACTGTCACACGCTCT  |
| <b><i>TBRG4</i></b>   | CAGCCTGACTTCTGGTGAGGTG  | GTGATGCCTGCGCTCTGTTCA   |
| <b><i>TCOF1</i></b>   | CAGGAAGACTCTGAGAGCAGTG  | CCCTTTTGCTGAAGGTGCTCTG  |
| <b><i>TFB2M</i></b>   | GGGAAAACCAAGTAGACCTCCAC | TTTCGAGCGCAACCACTTTGGC  |
| <b><i>TMEM97</i></b>  | GAGCAAGATGGTGTGAGGAACC  | AGGTTGCAGTGAGCCGAGATCA  |
| <b><i>UNG</i></b>     | CCACACCAAGTCTTACCTGGA   | CCGTGAGCTTGATTAGGTCCATG |
| <b><i>UTP20</i></b>   | GAGACTTTCAGACCATCACCTC  | ACTCATCAGGCACATGCTGGCA  |
| <b><i>WDR43</i></b>   | CCTCCACAAACCGAGCAAGTAG  | GCTATTCGTCTGGAGGTCTTCC  |
| <b><i>WDR74</i></b>   | GAAAACAGGCGGCGAACTTCAC  | TGCTGAAGTGCTTCACCGTCTT  |
| <b><i>GLS1</i></b>    | CAGAAGGCACAGACATGGTTGG  | GGCAGAAACCACCATTAGCCAG  |

## SUPPLEMENTARY REFERENCES

- 1 Hoadley, K. A. et al. Cell-of-Origin Patterns Dominate the Molecular Classification of 10,000 Tumors from 33 Types of Cancer. *Cell* 173, 291-304 e296, doi:10.1016/j.cell.2018.03.022 (2018).
- 2 Cerami, E. et al. The cBio cancer genomics portal: an open platform for exploring multidimensional cancer genomics data. *Cancer Discov* 2, 401-404, doi:10.1158/2159-8290.CD-12-0095 (2012).
- 3 Gao, J. et al. Integrative analysis of complex cancer genomics and clinical profiles using the cBioPortal. *Sci Signal* 6, p11, doi:10.1126/scisignal.2004088 (2013).
- 4 Archer, T. C. et al. Proteomics, Post-translational Modifications, and Integrative Analyses Reveal Molecular Heterogeneity within Medulloblastoma Subgroups. *Cancer Cell* 34, 396-410 e398, doi:10.1016/j.ccell.2018.08.004 (2018).
- 5 Cavalli, F. M. G. et al. Intertumoral Heterogeneity within Medulloblastoma Subgroups. *Cancer Cell* 31, 737-754 e736, doi:10.1016/j.ccell.2017.05.005 (2017).
- 6 Subramanian, A. et al. Gene set enrichment analysis: a knowledge-based approach for interpreting genome-wide expression profiles. *Proc Natl Acad Sci U S A* 102, 15545-15550, doi:10.1073/pnas.0506580102 (2005).
- 7 Liberzon, A. et al. The Molecular Signatures Database (MSigDB) hallmark gene set collection. *Cell Syst* 1, 417-425, doi:10.1016/j.cels.2015.12.004 (2015).
- 8 Brabetz, S. et al. A biobank of patient-derived pediatric brain tumor models. *Nat Med* 24, 1752-1761, doi:10.1038/s41591-018-0207-3 (2018).
